# Supplementary material for: A unique copper(ii)-assisted transformation of acetylacetone dioxime in acetone that leads to one-dimensional, quinoxaline-bridged coordination polymers
Source: Royal Society of Chemistry journal article supplement (doi:10.1039/c6dt03595g), 2016-11-28
Supplement: c6dt03595g1.pdf [file c6dt03595g1.pdf]

## ELECTRONIC SUPPLEMENTARY INFORMATION

to

### **A unique copper(II)-assisted transformation of acetylacetonedioxime in acetone that leads to one-dimensional, quinoxaline-bridged coordination polymers**

Zoi G. Lada,<sup>a,b</sup> Amaia Soto Beobide,<sup>a</sup> Aikaterini Savvidou,<sup>c</sup> Catherine P. Raptopoulou,<sup>c</sup> Vassilis Psycharis,<sup>\*c</sup> George A. Voyiatzis,<sup>\*a</sup> Mark M. Turnbull<sup>\*d</sup> and Spyros P. Perlepes<sup>\*a,b</sup>

This work is dedicated to Professor Jan Reedijk for his great contributions to inorganic chemistry over the last 45 years and on the occasion of his retirement.

---

<sup>a</sup> Foundation for Research and Technology- Hellas (FORTH), Institute of Chemical Engineering Sciences (ICE-HT), Platani, P.O. Box 1414, 26504 Patras, Greece. E-mail: [qvog@iceht.forth.gr](mailto:qvog@iceht.forth.gr); Tel: +30 2610 965253

<sup>b</sup> Department of Chemistry, University of Patras, 26504 Patras, Greece. E-mail: [perlepes@patreas.upatras.gr](mailto:perlepes@patreas.upatras.gr); Tel: +30 2610 996730

<sup>c</sup> Institute of Nanoscience and Nanotechnology, NCSR "Demokritos", 153 10 Aghia Paraskevi Attikis, Greece. E-mail: [v.psycharis@inn.demokritos.gr](mailto:v.psycharis@inn.demokritos.gr); Tel: +30 210 6503346

<sup>d</sup> Carlson School of Chemistry and Biochemistry, Clark University, Worcester, MA, USA. E-mail: [MTurnbull@clarku.edu](mailto:MTurnbull@clarku.edu); Tel: +1-508-7937167

---

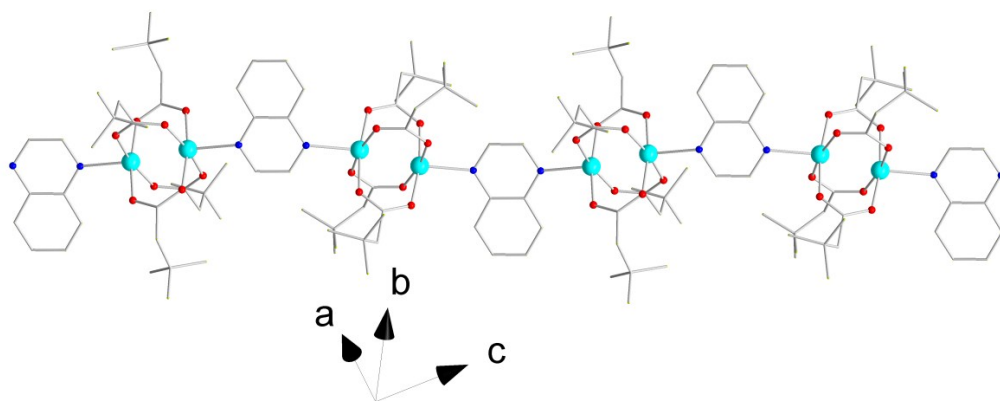

**Fig. S1** A portion of a chain that is present in the crystal of  $\{[\text{Cu}_2(\text{diba})_4(\text{qunx})]\}_n$  (**1**) illustrating four  $\text{Cu}_2$  units.

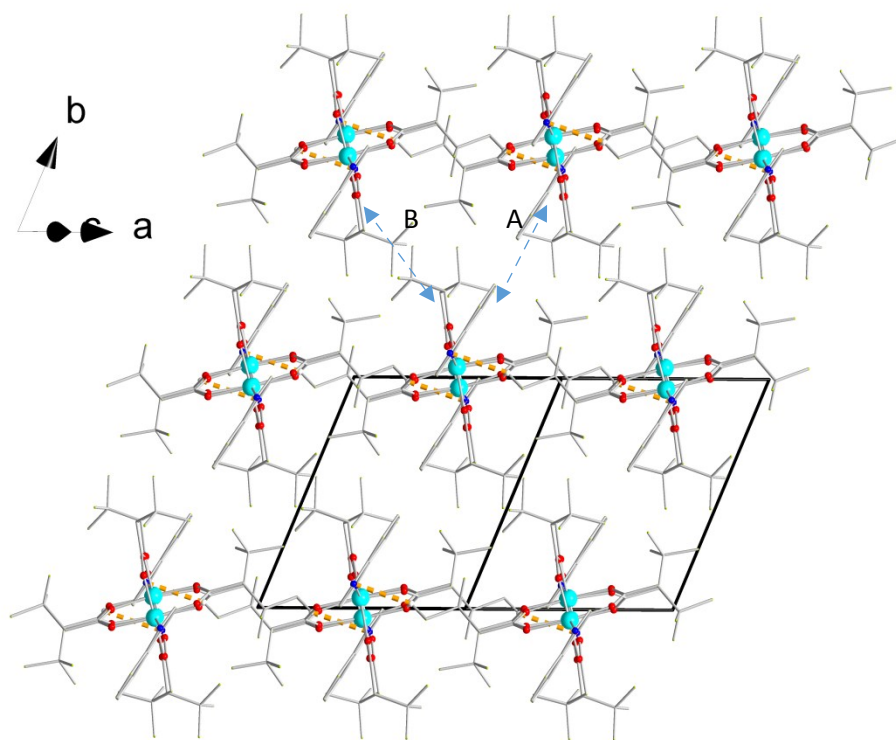

**Fig. S2** The arrangement of layers in the structure of  $\{[\text{Cu}_2(\text{diba})_4(\text{qunx})]\}_n$  (**1**).

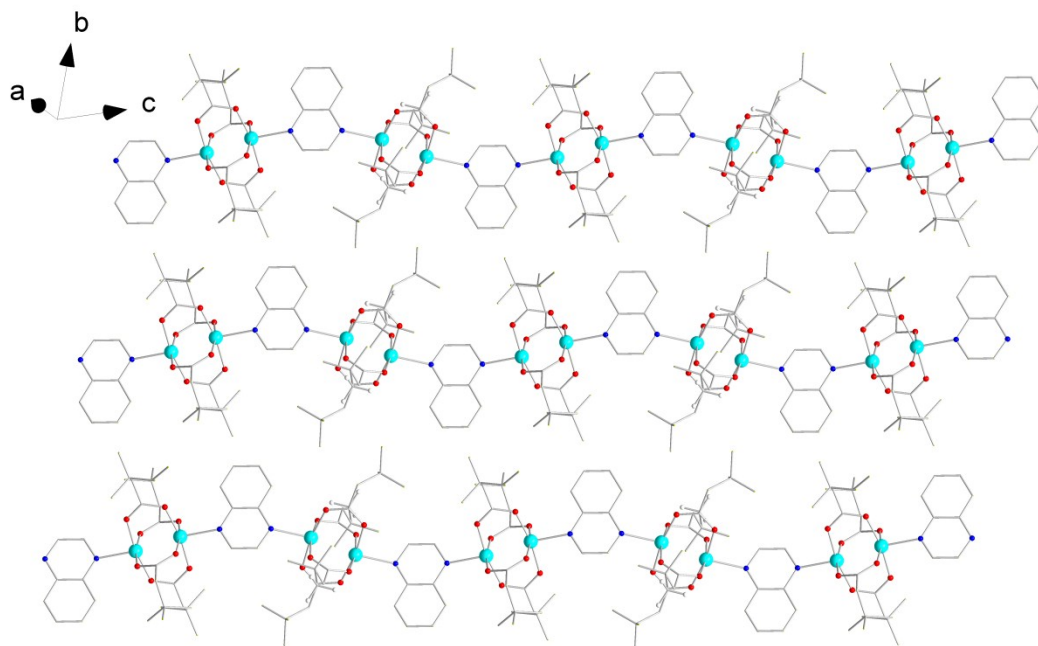

**Fig. S3** A view of the arrangement of chains in the structure of  $\{[\text{Cu}_2(\text{diba})_4(\text{qunx})]\}_n$  (**1**). The chains along the direction indicated with the double dashed arrow A in Fig. S2 are located within the (101) plane and are at distances of 11.0985(2) Å (*b* axis length).

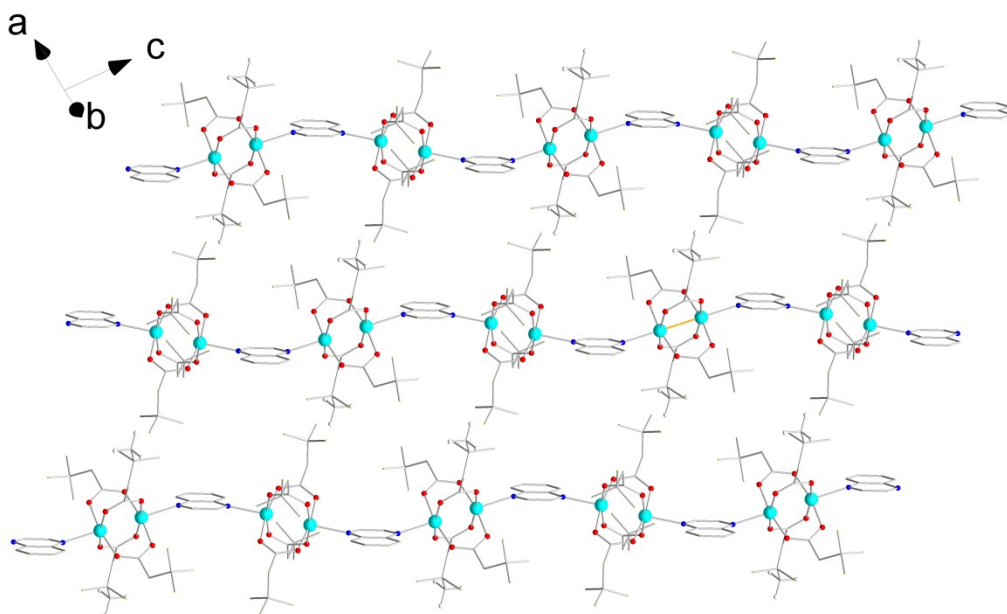

**Fig. S4** Another view of the arrangement of chains in the structure of  $\{[\text{Cu}_2(\text{diba})_4(\text{qunx})]\}_n$  (**1**). The chains along the direction indicated with the double dashed arrow B in Fig. S2 are located within the (111) plane and are at distances of 11.738(2) Å.

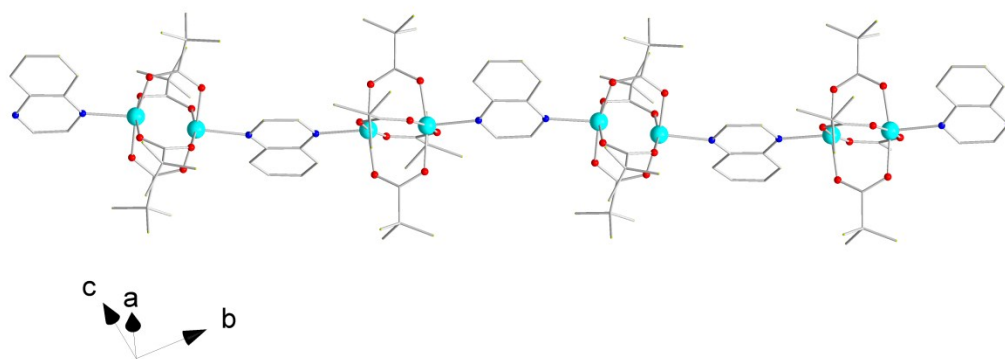

**Fig. S5** A portion of a chain that is present in the crystal of  $\{[\text{Cu}_2(\text{piv})_4(\text{qunx})]\}_n$  (**2**) illustrating four  $\text{Cu}_2$  units.

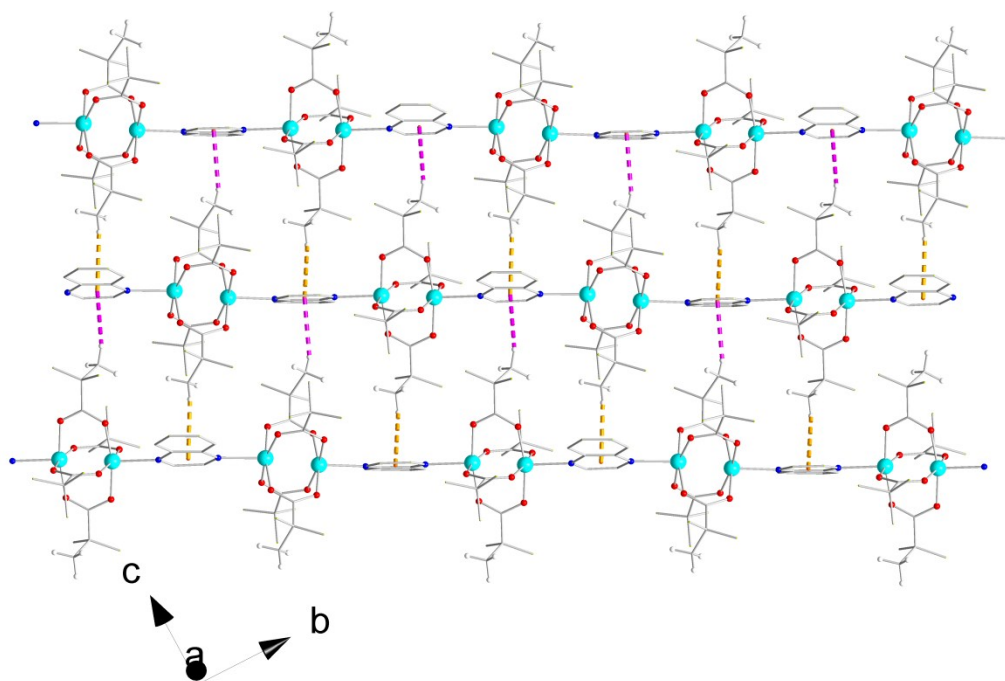

**Fig. S6** The formation of a layer parallel to the (100) plane through C(methyl)–H... $\pi$ (diazine) interactions; the interactions are shown with dashed orange and dashed magenta lines.

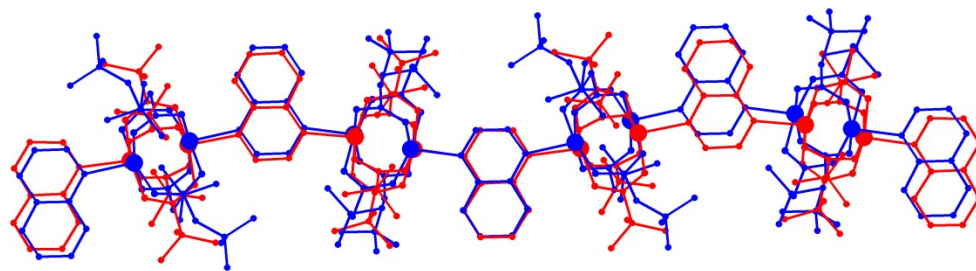

**Fig. S7** Portions of the chains of complexes **1** (blue) and **2** (red) in an overlapped mode.

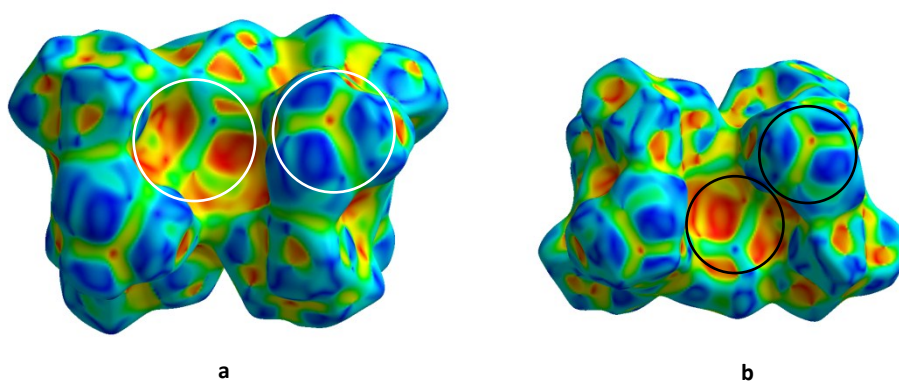

**Fig. S8** S map for **2**. Circled with white lines (a) and black lines (b) are the contact areas of HS which indicate the C5–H5A...Cg1 and C14–H14A...Cg1 interactions, respectively.

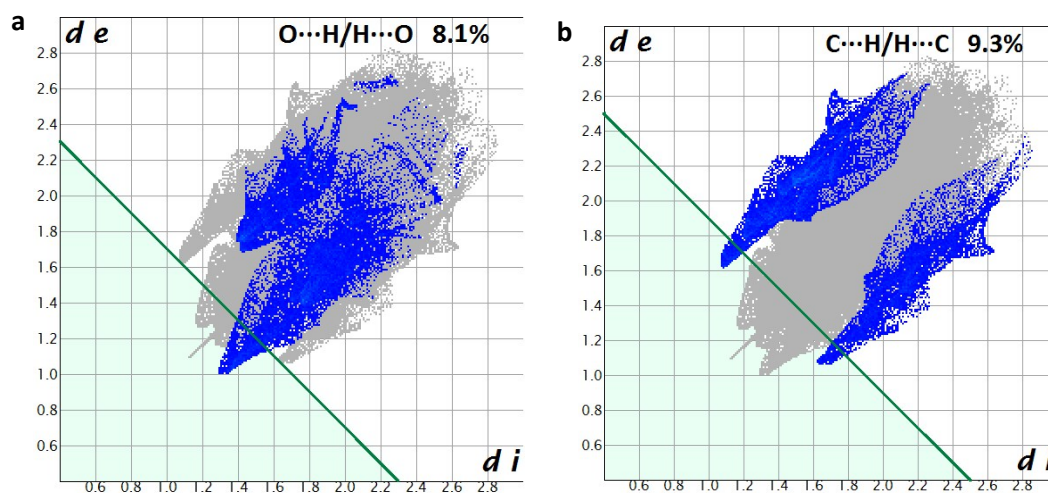

**Fig. S9** O...H/ H...O (a) and C...H/H...C (b) contributions (blue areas), along with the other kinds of contacts (gray area), into the 2D fingerprint plot for compound **2**. For the meaning of the green line, see text of the main ms.

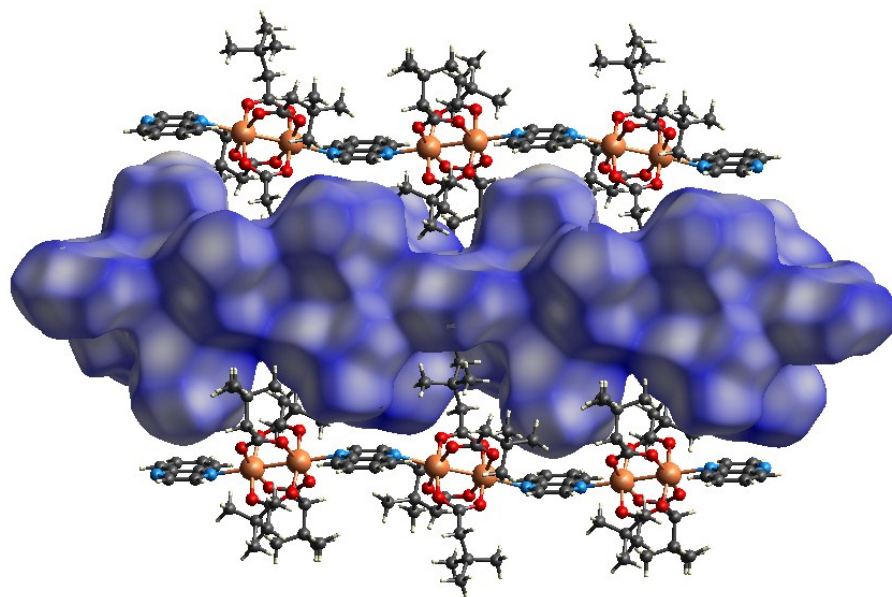

**Fig. S10** A combined HS  $d_{\text{norm}}$  map and the molecular representation of neighbouring chains within the layers of complex **1**.

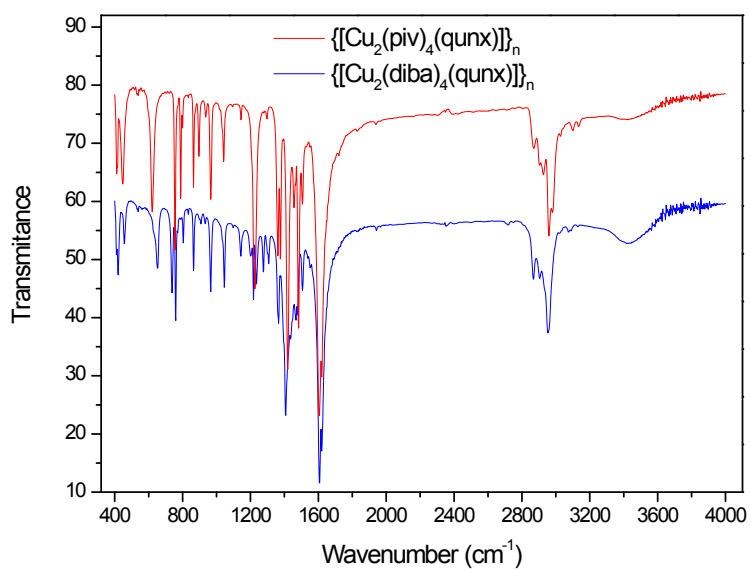

**Fig. S11** The FT-IR (KBr) spectra of  $\{[\text{Cu}_2(\text{diba})_4(\text{qunx})]\}_n$  (**1**, bottom plot) and  $\{[\text{Cu}_2(\text{piv})_4(\text{qunx})]\}_n$  (**2**, upper plot).

**Table S1** Selected interatomic distances and angles for complex **1**<sup>a</sup>

| Distances (Å)     |          |                  |          |
|-------------------|----------|------------------|----------|
| Cu1...Cu1'        | 2.609(2) | Cu1-N1           | 2.261(2) |
| Cu2...Cu2'        | 2.611(1) | Cu2-O5           | 1.964(2) |
| Cu1...Cu2         | 7.159(2) | Cu2-O6''         | 1.960(2) |
| Cu1-O1            | 1.971(2) | Cu2-O7           | 1.978(2) |
| Cu1-O2'           | 1.958(2) | Cu2-O8''         | 1.962(2) |
| Cu1-O3            | 1.945(2) | Cu2-N2           | 2.245(2) |
| Cu1-O4'           | 1.950(2) |                  |          |
| Angles (°)        |          |                  |          |
| O1-Cu1-O2'        | 169.1(1) | O5-Cu2-O6''      | 169.4(1) |
| O1-Cu1-O3         | 89.5(1)  | O5-Cu2-O7        | 88.1(1)  |
| O1-Cu1-O4'        | 87.8(1)  | O5-Cu2-O8''      | 90.1(1)  |
| O1-Cu1-N1         | 91.0(1)  | O5-Cu2-N2        | 90.6(1)  |
| O2'-Cu1-O3        | 88.4(1)  | O6''-Cu2-O7      | 90.8(1)  |
| O2'-Cu1-O4'       | 92.3(1)  | O6''-Cu2-O8''    | 88.3(1)  |
| O2'-Cu1-N1        | 99.9(1)  | O6''-Cu2-N2      | 99.9(1)  |
| O3-Cu1-O4'        | 169.1(1) | O7-Cu2-O8''      | 169.1(1) |
| O3-Cu1-N1         | 101.1(1) | O7-Cu2-N2        | 90.6(1)  |
| O4'-Cu1-N1        | 89.5(1)  | O8''-Cu2-N2      | 100.2(1) |
| Cu1...Cu2...Cu2'' | 160.3(1) | Cu1'...Cu1...Cu2 | 158.2(1) |

<sup>a</sup>Symmetry operations used to generate equivalent atoms: (') -x, -y+2, -z; (") -x, -y+2, -z+1.

**Table S2** Selected interatomic distances and angles for complex **2<sup>a</sup>**

| Distances (Å)     |           |                     |           |
|-------------------|-----------|---------------------|-----------|
| Cu1...Cu2         | 2.606(2)  | Cu1-N2'             | 2.247(13) |
| Cu1''...Cu2       | 7.274(2)  | Cu2-O2              | 1.954(11) |
| Cu1-O1            | 1.945(10) | Cu2-O4              | 1.957(10) |
| Cu1-O3            | 1.941(10) | Cu2-O5              | 1.938(11) |
| Cu1-O6            | 1.943(10) | Cu2-O7              | 1.939(10) |
| Cu1-O8            | 1.955(10) | Cu2-N1              | 2.233(13) |
| Angles (°)        |           |                     |           |
| O1-Cu1-O3         | 89.2(5)   | O2-Cu2-O4           | 87.8(5)   |
| O1-Cu1-O6         | 169.1(4)  | O2-Cu2-O5           | 167.6(4)  |
| O1-Cu1-O8         | 90.1(5)   | O2-Cu2-O7           | 89.9(5)   |
| O1-Cu1-N2'        | 95.4(5)   | O2-Cu2-N1           | 97.1(5)   |
| O3-Cu1-O6         | 89.1(5)   | O4-Cu2-O5           | 90.1(5)   |
| O3-Cu1-O8         | 167.7(4)  | O4-Cu2-O7           | 170.4(4)  |
| O3-Cu1-N2'        | 103.9(5)  | O4-Cu2-N1           | 90.4(5)   |
| O6-Cu1-O8         | 89.3(5)   | O5-Cu2-O7           | 90.1(5)   |
| O6-Cu1-N2'        | 95.5(5)   | O5-Cu2-N1           | 95.1(4)   |
| O8-Cu1-N2'        | 88.5(5)   | O7-Cu2-N1           | 99.1(5)   |
| Cu1...Cu2...Cu1'' | 166.5(4)  | Cu2...Cu1''...Cu2'' | 164.2(4)  |

<sup>a</sup>Symmetry operations used to generate equivalent atoms: (')  $-x+3/2, y+1/2, z+1/2$ ; (')  $-x+3/2, y-1/2, z-1/2$ .
